# Supplementary material
Source: PubMed Central journal article supplement (PMC527187)
Supplement: plntcell_tpc.104.024992_4.pdf [file plntcell_tpc.104.024992_4.pdf]

*A. thaliana*: 1 ...MARLI IPCRSSSLARVNLGLLSRAPVVPVSSCLRSSANRLTQHRPFLTS ETRHKQMS RRLICSVAT ESW PDKAKD SKMDAPKE IFLKNY T--KPDYY FE TWDLSFSLGEEKIIVS S 114  
*O. sativa*: 1 .....MAASP RQFRGQRL --PRCASP LSYDLRLRPDLAACA----FSGSAAVAVAVS 47  
*H. sapiens*: 1 .....NPEKRP FERL --PADVSP INYSLCLKPD L----LDF TF-----EG 34  
*M. musculus*: 1 .....MMLAAA VPSLAR RLLLLGPP PPL LLLL LSRSSRRRRRIHSLGLAAMPKRP FERL --PAEVSP INYSLCLKPD L----LDF TF-----EG 79  
*D. melanog.*: 1 .....NAQKAKF ERL --PTNVVP RHYELLLQPNL ---KEP TF-----TG 34  
*C. elegans*: 1 .....NAACGNPSAAVVF --ER-LPTFA--EPTHY --NVRLSFSFDGHATIDVT 47

*A. thaliana*: 115 KIKVSPRVRGSSAALVLDGHD LKLLSVKVEGKLLK EGD-----YQLDSRHLLT --PSLPAEESFVLE IDT EITPHKNTSLEGLYKS-----SGNF---C TQC EAEGFRKITFYQD 214  
*O. sativa*: 48 APTRF-----LVINAA RLAVD GSSVRFQARAHRL--VRGGRDRGHRV RPSAD RRGRAQDGLHRD AQRSDERLLQEVSLP PLSVTDNCKYKYKGS RMAV TQF EAADARRCFPCWD 167  
*H. sapiens*: 35 KLEAAAQVRQATNQIVMNCADID IITASYA---P EGD ERIHATGFNYQNKDEKVTLSF PSTLQTGCTGT LKID--FV GELNDKMKCFYRSKY TTP SCEVRYAAV TQF EATDARRAFPCWD 148  
*M. musculus*: 80 KLEAAAQVRQATNQIVMNCADID IITASYA---P EGD ERIHATGFNYQNKDEKVTLSF PSTLQTGCTGT LKID--FV GELNDKMKCFYRSKY TTP SCEVRYAAV TQF EATDARRAFPCWD 193  
*D. melanog.*: 35 KTVVQGVNKEP TTQITL NALDIVLDSV BLHSEKLP EKI V-----YSAENRATL EFAEIPAE TQCVLHM--SFTGE LNDKMKCFYRSKY FCGRRFP--ACV TQF EATDARRCFPCWD 148  
*C. elegans*: 48 IKREATDVLKWAHQS LLIQSVSLIT QPGDASKSLET SYD-----DKLNLITKL--PTT MQPQK--VQLDFK FV GELNDKMKCFYRSKYTKTKERFLAS--TQF ESTYARYAFPCFD 152

*A. thaliana*: 215 RPDITHAKY--TCRVE GDKTL YPVVLLSNGNLISQC---D IEGGRHYALW ED PFKKPCYLFALVAGQLVSPDD TPT TRSCRQVSLKHTPAEDL PRT AHAMYS IKAAMGDEDFVGFYDLD 329  
*O. sativa*: 168 EPAFKAKFKLT LEVPS EL---VALS MNPVIKET---VHGPLRTVYYE ES PLMS-TYLVAVVUCLFDYIEGS--TLE CTRV--RVTY---QVGRSNQGFALDVAVKS-KDYFAT PYPLP 275  
*H. sapiens*: 149 EPAIKATFDISLVV PKDR---VALS MNNVID RKPYPDENLVEVKFART PVMS-TYLVAFVUG EY---DFVETRSKDGV CVRVYIPV GKAE QGKFALEVAAKTLP FYKDYFNVPYPLP 259  
*M. musculus*: 194 EPAIKATFDISLVV PKDR---VALS MNNVID RKPYPDENLVEVKFART PVMS-TYLVAFVUG EY---DFVETRSKDGV CVRVYIPV GKAE QGKFALEVAAKTLP FYKDYFNVPYPLP 304  
*D. melanog.*: 149 EPAIKATFDITLVV PKER---VALS MNPVIKEDSLPD--GLRRVR--FD RT PIMS-TYLVAVVUG EY---DYVEGRSDGVLWRVFIPV GKRE QGTFALEVAATKVL PYYQDYFNLA YPLP 258  
*C. elegans*: 153 EP IYKATF--DVTLEVENHL--TALS MNNVISETP TAD--GKRKAVTFA TSKMS--SYLVAFVUGEL---EYISAQTKSGVEHRYVT---V PKRQGGYSIDL SVKGYNEWFDIRYPLP 264

*A. thaliana*: 330 LFNITVAVPD FNMCA MENKSLNIFNSKVL LASP ETATDAD YAA ILCVI CHEYFENOT CNRVTICFDW FQLSLK ECLTVF-----RDQE FSS--DMCSRTVKRIAD VSKLRIYQF PQDAGPMAH 443  
*O. sativa*: 276 KLDMVAIPD FAAGAMENYGLV TYRE TALLYD ELLSSASNKQVAI TVAHE LALH QVFNGLVIMEW THLWLN ECFASWVSYLAVAL FPEWNNW TQFID--ETTSGLR-----LDALAKSH 388  
*H. sapiens*: 260 KIDL IAIADFAAGAMENWCLV TYRE TALLID PKNS CSS SRQWVALV VGH E LALH QVFNGLVIMEW THLWLN ECFASWVSYLVCV DHC FPEYDIWTQFVS--ADYTRAQ-----ELDALDN SH 373  
*M. musculus*: 305 KIDL IAIADFAAGAMENWCLV TYRE TALLID PKNS CSS SRQWVALV VGH E LALH QVFNGLVIMEW THLWLN ECFASWVSYLVCV DHC FPEYDIWTQFVS--ADYTRAQ-----ELDALDN SH 418  
*D. melanog.*: 259 KMDL IAIADFAAGAMENWCLV TYRE TALLVDPKNT SLMRKQ SIAL TVCHELALH QVFNGLVIMEW THLWLN ECFASVFLC VVHLFPEYDIWTQFVT--DMYTRAL-----ELDSLKNSH 371  
*C. elegans*: 265 KCDL IAIADP FSMCA MENWCLV TYRE TALLVDP CVSTRQKSRVALVVAHE LALH QVFNGLVIMEW THLWLN ECFASV-----MEYMFVC-----ANCP EFKISCMCLDALRNSH 378

*A. thaliana*: 444 PVR-----DHSYIRVYKRWULFTNSULLYAGAEVVRMYKTL LCTQC FRKCIDLYFR RHD RQAVTCED FFAANRDANNADFANFLQ--WYSQACTPVVRVWSSSYNADARTFS LKFSQEI PPT 556  
*O. sativa*: 389 P I EVD-----INHAS EIDAI-----FDSI SYDKGASVI RMLQSYLGAERFQNALAS YIKRYAYSNAKT EDLWAVLEBESGE PVKDLMTT WTKQCSYVPIYAKLD GHD LHLQE QFLSDGSSGP 501  
*H. sapiens*: 374 P I EVSVGHPSEVD E I FD-----AI SYSKGASVI RMLHDY ICDKDFRKGMMNYLTKPQQRNAAT EDLWESL EASCKPIAAVMTNT WTKQCFPLIYVBARQVEDDLRL--SQKRFCA 484  
*M. musculus*: 419 P I EVSVGHPSEVD E I FD-----AI SYSKGASVI RMLHDY ICDKDFRKGMMNYLTKPQQRNAAT EDLWESL EASCKPIAAVMTNT WTKQCFPLIYVBARQVEDDLR--LHLSQRKFCFA 529  
*D. melanog.*: 372 P I EVVPGHPSEID E I FDE-----I SYNKGASVI RMLHDY ICDTFRKGMNLYLT RHQYGNCT CT EDLWAAALQKASSKNVSDVMTS WTKHKCFPVVSV ESEQTSNQRLLRLKCKFTIADCS 486  
*C. elegans*: 379 P I EVIDNPNELD E I YDSI-----TYAKSSWN RMLCYLLSEPVFQRGLRLYLKRRQYSNAVT QDLWALASRASCQNVNBLMSCWTKQCFPVLRVSRQDQGNRILTV--EQRRFIS 489
