# Supplementary material
Source: PubMed Central journal article supplement (PMC527187)
Supplement: plntcell_tpc.104.024992_6.pdf [file plntcell_tpc.104.024992_6.pdf]

**Supplemental Table 1.** BLAST results of MPA1 protein in different species.

| <b>Species</b>         | <b>Protein</b> | <b>Score</b>    | <b>Expect</b> | <b>Identities</b> | <b>Positives</b> | <b>Gaps</b>  |
|------------------------|----------------|-----------------|---------------|-------------------|------------------|--------------|
| <i>A. thaliana</i>     | GI:22329112    | 89.4 bits (220) | 2e-17         | 99/431 (22%)      | 73/431 (40%)     | 48/431 (11%) |
| <i>O. sativa</i>       | GI:37805957    | 89.4 bits (220) | 1e-17         | 86/343 (25%)      | 144/343 (41%)    | 25/343 (7%)  |
| <i>H. sapiens</i>      | GI:15451907    | 111 bits (278)  | 6e-24         | 128/513 (24%)     | 218/513 (42%)    | 83/513 (16%) |
| <i>M. musculus</i>     | GI:16307131    | 113 bits (282)  | 1e-24         | 131/526 (24%)     | 224/526 (42%)    | 85/526 (16%) |
| <i>D. melanogaster</i> | GI:12083059    | 129 bits (323)  | 1e-29         | 143/563 (25%)     | 236/563 (41%)    | 74/563 (13%) |
| <i>C. elegans</i>      | GI:17540512    | 115 bits (288)  | 1e-25         | 136/566 (24%)     | 227/566 (40%)    | 97/566 (17%) |
