# Supplementary material
Source: PubMed Central journal article supplement (PMC527187)

*Hind III*

*EcoR V*

10 Kb

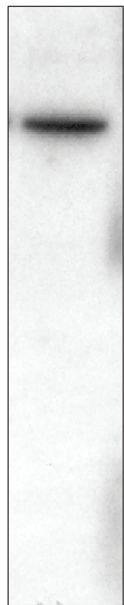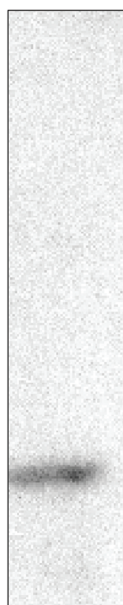

6.5 Kb

**A**

**FISH**

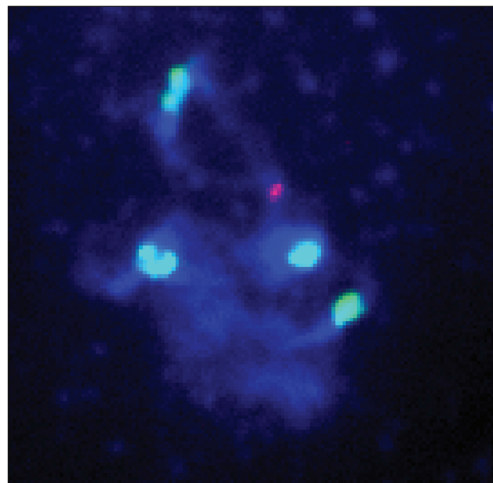

● Centromeres

● T-DNA

**B**

Supplement: plntcell_tpc.104.024992_1.pdf [file plntcell_tpc.104.024992_1.pdf]

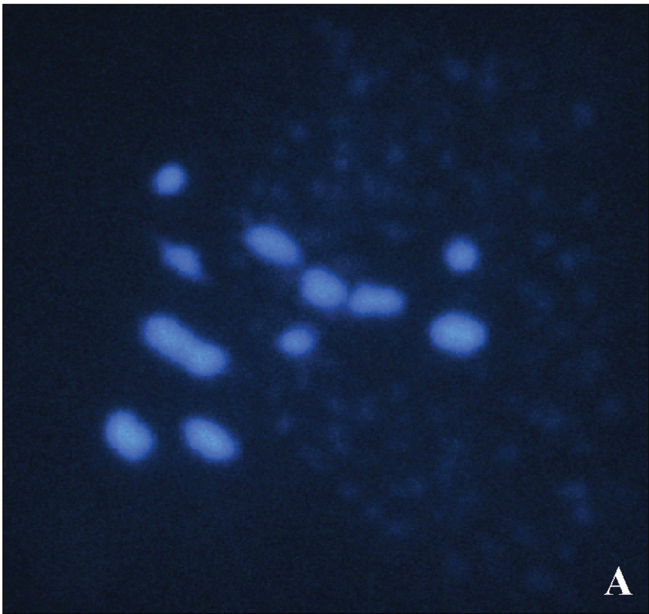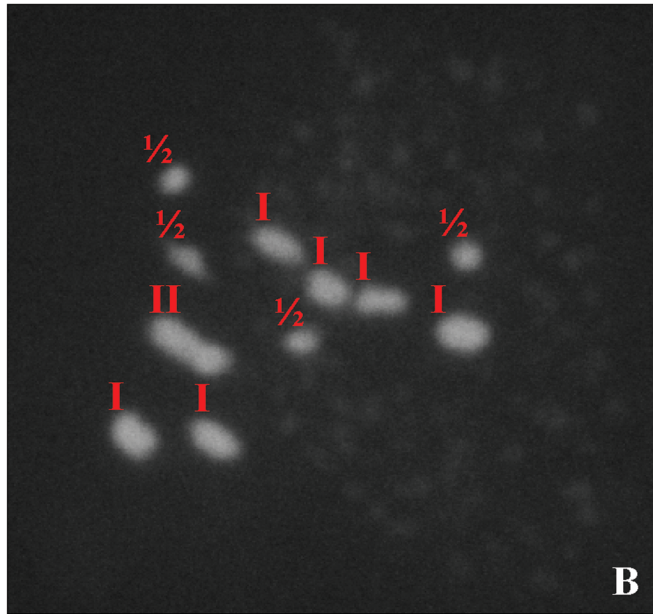

Supplement: plntcell_tpc.104.024992_2.pdf [file plntcell_tpc.104.024992_2.pdf]

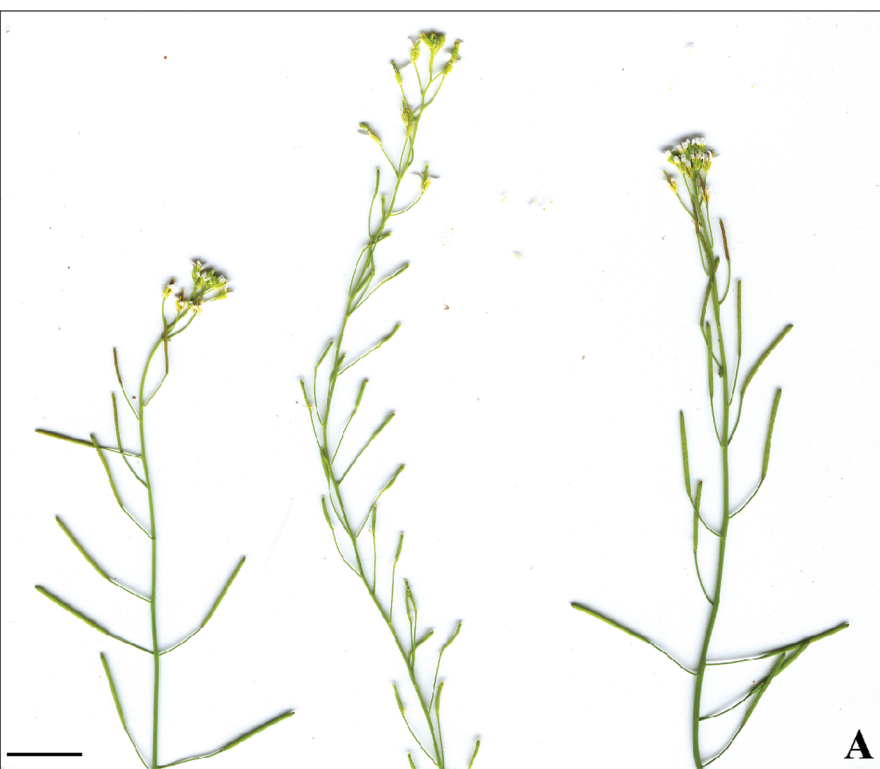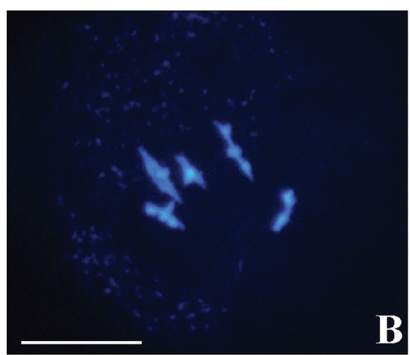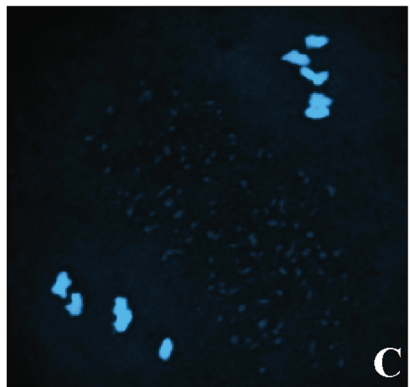

Supplement: plntcell_tpc.104.024992_3.pdf [file plntcell_tpc.104.024992_3.pdf]

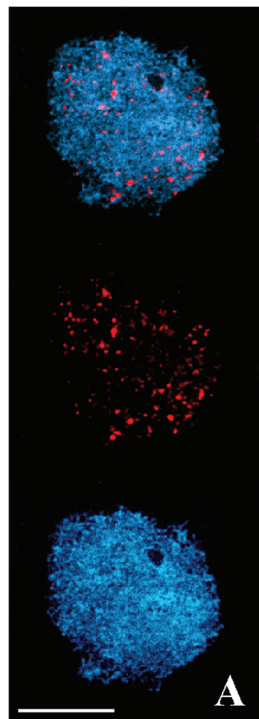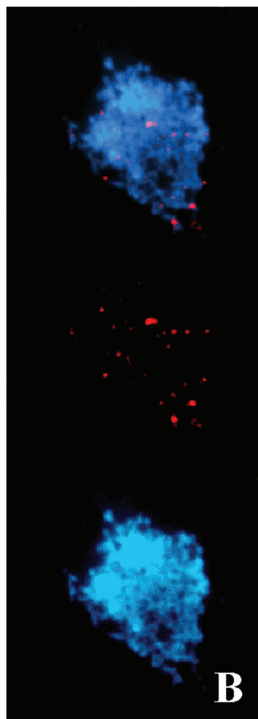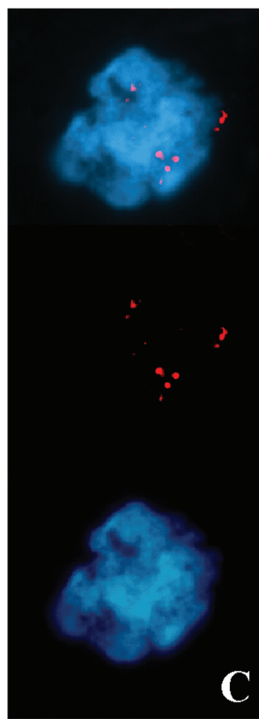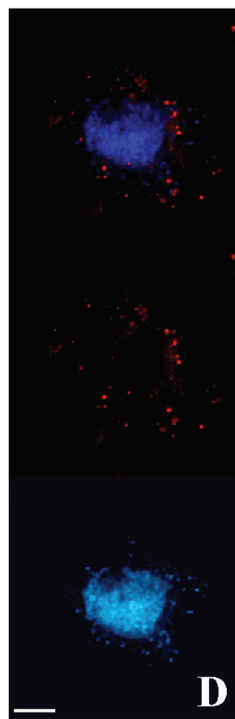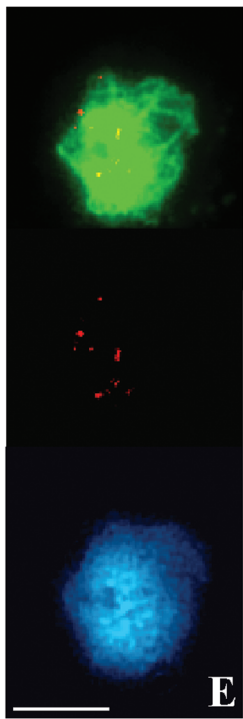

Supplement: plntcell_tpc.104.024992_5.pdf [file plntcell_tpc.104.024992_5.pdf]
